# Supplementary material for: Comparison of anti-inflammatory effects of rivaroxaban vs. dabigatran in patients with non-valvular atrial fibrillation (RIVAL-AF study): multicenter randomized study
Source: Springer Nature journal article supplement (doi:10.1007/s00380-018-01324-7), 2019-01-01
Supplement: MOESM1 [file 16367878]

Table S1. Adverse events

|  | Rivaroxaban (n=91) | Dabigatran (n=96) |
| --- | --- | --- |
| Adverse events | 17 (18.7) | 20 (20.8) |
| Coronary event | 1 (1.1) | 1 (1.0) |
| Heart failure | 1 (1.1) | 2 (2.1) |
| Bleeding events | 11 (12.1) | 11 (11.5) |
| Major bleeding | 3 (3.3) | 5 (5.2) |
| gastrointestinal bleeding | 1 (1.1) | 2 (2.1) |
| hemorrhoidal bleeding | 1 (1.1) | 3 (3.1) |
| hematuria | 1 (1.1) | 0 (0) |
| Minor bleeding | 8 (8.8) | 6 (6.3) |
| gastrointestinal bleeding | 2 (2.2) | 0 (0) |
| hemorrhoidal bleeding | 0 (0) | 0 (0) |
| hematuria | 2 (2.2) | 1 (1.0) |
| gingival bleeding | 1 (1.1) | 1 (1.0) |
| hematopsia | 0 (0) | 2 (2.1) |
| nasal bleeding | 1 (1.1) | 0 (0) |
| hemosputum | 1 (1.1) | 0 (0) |
| other | 1 (1.1) | 2 (2.1) |
| Gastrointestinal symptom | 1 (1.1) | 5 (5.2) |
| Interstitial pneumonia | 1 (1.1) | 0 (0) |
| Other | 3 (3.3) | 3 (3.1) |

Data given as n (%).

Table S2. Baseline characteristics according to bleeding events (on the 1-month landmark sub-analysis)

|  | no bleeding (n=155) | bleeding (n=18) | P-value |
| --- | --- | --- | --- |
| Age (years) | 71.5±0.6 | 68.5±1.9 | 0.13 |
| Female | 44 (28) | 3 (17) | 0.29 |
| CHF | 34 (22) | 3 (17) | 0.61 |
| Hypertension | 136 (88) | 16 (89) | 0.89 |
| Diabetes | 35 (23) | 8 (44) | 0.042 |
| Hyperlipidemia | 102 (66) | 14 (78) | 0.31 |
| CKD | 58 (38) | 6 (35) | 0.85 |
| Rivaroxaban | 75 (48) | 8 (44) | 0.75 |
| Prior use of Warfarin | 67 (43) | 14 (78) | 0.0054 |
| CHA2D2-VASc score >4 | 58 (37) | 6 (33) | 0.73 |
| HASBLED score ≥3 | 73 (50) | 9 (50) | 1 |

Data given as means ± SD or n (%).
